# Supplementary material for: SMILES-based deep generative scaffold decorator for de-novo drug design
Source: PubMed Central journal article supplement (PMC7260788; doi:10.1186/s13321-020-00441-8), 2020-05-29
Supplement: 13321_2020_441_MOESM2_ESM.pdf [file 13321_2020_441_MOESM2_ESM.pdf]

# Additional figures and tables

## SMILES-based deep generative scaffold decorator for de-novo drug design

Josep Arús-Pous<sup>§</sup><sup>⊥</sup><sup>\*</sup>, Atanas Patronov<sup>§</sup>, Esben Jannik Bjerrum<sup>§</sup>, Christian Tyrchan<sup>||</sup>, Jean-Louis Reymond<sup>⊥</sup>, Hongming Chen<sup>¥</sup>, Ola Engkvist<sup>§</sup>.

§ Molecular AI, Hit Discovery, Discovery Sciences, BioPharmaceutical R&D, AstraZeneca, Gothenburg, Sweden.

|| Medicinal Chemistry, Respiratory Inflammation, and Autoimmune (RIA), BioPharmaceutical R&D, AstraZeneca, Gothenburg, Sweden.

⊥ Department of Chemistry and Biochemistry, University of Bern, Freiestrasse 3, 3012 Bern, Switzerland.

¥ Chemistry and Chemical Biology Centre, Guangzhou Regenerative Medicine and Health - Guangdong Laboratory, Guangzhou, China

\* Corresponding author: [josep.arus@dcb.unibe.ch](mailto:josep.arus@dcb.unibe.ch)

## Additional Tables

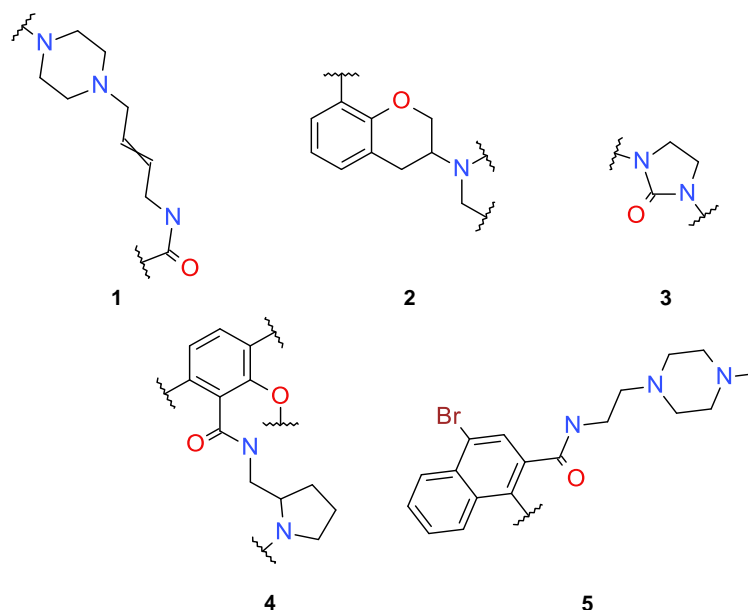

| S | Generated |        | ChEMBL decoys |        |      | DRD2 decoys |        |      |
|---|-----------|--------|---------------|--------|------|-------------|--------|------|
|   | Total     | % act. | % act.        | % diff | EOR  | % act.      | % diff | EOR  |
| 1 | 11,628    | 47.2 % | 0.9 %         | 46.3 % | 52.6 | 4.0 %       | 43.2 % | 11.7 |
| 2 | 10,483    | 29.9 % | 8.0 %         | 21.9 % | 3.7  | 19.5 %      | 10.4 % | 1.5  |
| 3 | 77,548    | 26.1 % | 0.8 %         | 25.3 % | 32.2 | 15.6 %      | 10.5 % | 1.7  |
| 4 | 844       | 25.2 % | 0.4 %         | 24.9 % | 69.3 | 1.0 %       | 24.2 % | 25.1 |
| 5 | 182       | 28.0 % | 9.9 %         | 18.1 % | 2.8  | 15.1 %      | 12.9 % | 1.9  |

**Table S1:** Scaffolds obtained from the validation set of the DRD2 dataset alongside the results from the decoration process using the single-step decoration model. **Legend:** Total number of molecules sampled (Total); Percent of generated molecules that are predicted as active ( $p_{active} \geq 0.5$ ) by the APM (% act); For both the decoys decorated with ChEMBL fragments and DRD2 fragments from the training set: Percent of predicted active decoys ( $p_{active} \geq 0.5$ ) (% act); Difference between the generated predicted active percent and the predicted active percent of the decoys (% Diff); Enrichment Over Random ( $percent_{active}/percent_{decoy}$ ) (EOR).

| S | Generated |         | ChEMBL decoys |         |           | DRD2 decoys |         |           |
|---|-----------|---------|---------------|---------|-----------|-------------|---------|-----------|
|   | Total     | Sampled | Total         | Overlap | % overlap | Total       | Overlap | % overlap |
| 1 | 1,728     | 26,759  | 25,724        | 1       | 0.1 %     | 24,793      | 3       | 0.2 %     |
| 2 | 1,626     | 61,115  | 59,084        | 8       | 0.5 %     | 58,029      | 19      | 1.1 %     |
| 3 | 10,666    | 38,074  | 36,554        | 0       | 0 %       | 34,353      | 0       | 0 %       |
| 4 | 262       | 50,163  | 46,531        | 0       | 0 %       | 45,892      | 2       | 0.8 %     |
| 5 | 18        | 1,791   | 841           | 0       | 0 %       | 810         | 7       | 38.9 %    |

**Table S2:** Additional sampling statistics for the multi-step model sample of the five validation set scaffolds. **Legend:** Total number of unique molecules obtained with each sampling approach (Total); Number of sampled molecules in total using the decorator model (Sampled); Number of molecules that overlap between a given decoy set and the molecules generated with a decorator (Overlap); Ratio between the overlap and the total obtained (% overlap).

| S | Generated |         | ChEMBL decoys |         |           | DRD2 decoys |         |           |
|---|-----------|---------|---------------|---------|-----------|-------------|---------|-----------|
|   | Total     | Sampled | Total         | Overlap | % overlap | Total       | Overlap | % overlap |
| 1 | 11,628    | 124,225 | 118,331       | 14      | 0.1 %     | 109,585     | 21      | 0.2 %     |
| 2 | 10,483    | 129,515 | 126,403       | 3       | 0.0 %     | 124,635     | 39      | 0.4 %     |
| 3 | 77,548    | 117,598 | 114,277       | 19      | 0.0 %     | 104,535     | 44      | 0.1 %     |
| 4 | 844       | 130,914 | 120,527       | 1       | 0.1 %     | 117,799     | 77      | 9.1 %     |
| 5 | 182       | 130,988 | 38,040        | 4       | 2.2 %     | 27,823      | 58      | 31.9 %    |

**Table S3:** Additional sampling statistics for the single-step model sample of the five validation set scaffolds. **Legend:** Total number of unique molecules obtained with each sampling approach (Total); Number of sampled molecules in total using the decorator model (Sampled); Number of molecules that overlap between a given decoy set and the molecules generated with a decorator (Overlap); Ratio between the overlap and the total obtained (% overlap).

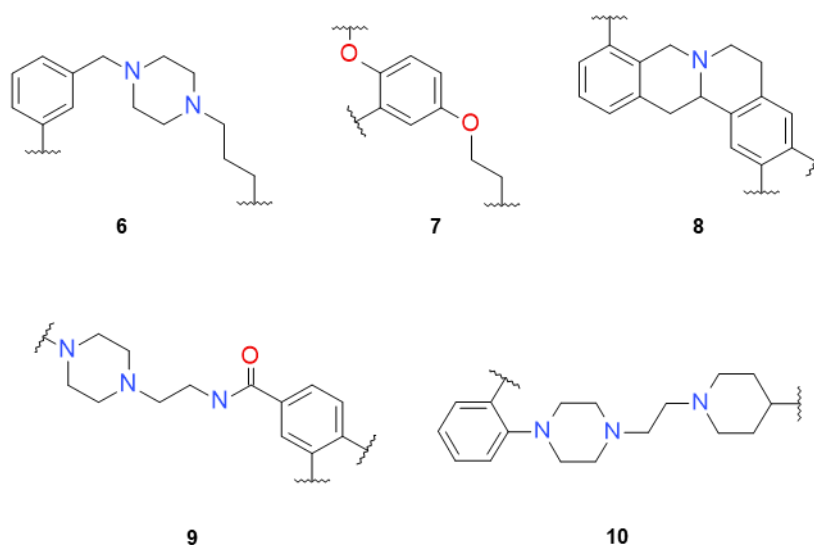

| S  | Generated |        | ChEMBL decoys |        |      | DRD2 decoys |        |     |
|----|-----------|--------|---------------|--------|------|-------------|--------|-----|
|    | Total     | % act. | % act.        | % diff | EOR  | % act.      | % diff | EOR |
| 6  | 15,885    | 78.1 % | 48.3 %        | 29.7 % | 1.6  | 64.6 %      | 13.5 % | 1.2 |
| 7  | 49,799    | 18.2 % | 1.0 %         | 17.2 % | 18.1 | 10.7 %      | 7.5 %  | 1.7 |
| 8  | 2,194     | 90.2 % | 44.1 %        | 46.1 % | 2.0  | 48.4 %      | 41.8 % | 1.9 |
| 9  | 1,525     | 8.8 %  | 2.9 %         | 5.8 %  | 3.0  | 6.8 %       | 1.9 %  | 1.3 |
| 10 | 9,278     | 96.4 % | 89.5 %        | 6.9 %  | 1.1  | 92.6 %      | 3.8 %  | 1.0 |

**Table S4:** Non-dataset scaffolds obtained from a generative model (see methods) and results of the decoration of each of them using the single-step decoration model. **Legend:** Total number of molecules sampled (Total); Percent of generated molecules that are predicted as active ( $p_{active} \geq 0.5$ ) by the APM (% act); For both the decoys decorated with ChEMBL fragments and DRD2 fragments from the training set: Percent of predicted active decoys ( $p_{active} \geq 0.5$ ) (% act); Difference between the generated predicted active percent and the predicted active percent of the decoys (% Diff); Enrichment Over Random ( $percent_{active}/percent_{decoy}$ ) (EOR).

| S  | Generated |         | ChEMBL decoys |         |           | DRD2 decoys |         |           |
|----|-----------|---------|---------------|---------|-----------|-------------|---------|-----------|
|    | Total     | Sampled | Total         | Overlap | % overlap | Total       | Overlap | % overlap |
| 6  | 1,864     | 21,947  | 20,665        | 8       | 0.4 %     | 19,857      | 26      | 1.4 %     |
| 7  | 15,724    | 528,094 | 501,054       | 15      | 0.1 %     | 480,975     | 100     | 0.6 %     |
| 8  | 2,178     | 70,617  | 62,618        | 105     | 4.8 %     | 60,091      | 175     | 8.0 %     |
| 9  | 5,362     | 143,101 | 124,532       | 32      | 0.6 %     | 117,511     | 70      | 1.3 %     |
| 10 | 1,012     | 13,491  | 10,843        | 7       | 0.7 %     | 10,058      | 40      | 3.9 %     |

**Table S5:** Additional sampling statistics for the multi-step model sample of the five non-dataset scaffolds. **Legend:** Total number of unique molecules obtained with each sampling approach (Total); Number of sampled molecules in total using the decorator model (Sampled); Number of molecules that overlap between a given decoy set and the molecules generated with a decorator (Overlap); Ratio between the overlap and the total obtained (% overlap).

| S  | Generated |         | ChEMBL decoys |         |           | DRD2 decoys |         |           |
|----|-----------|---------|---------------|---------|-----------|-------------|---------|-----------|
|    | Total     | Sampled | Total         | Overlap | % overlap | Total       | Overlap | % overlap |
| 6  | 15,885    | 127,281 | 113,932       | 215     | 1.4 %     | 100,916     | 922     | 5.8 %     |
| 7  | 49,799    | 126,284 | 124,656       | 17      | 0.0 %     | 123,476     | 79      | 0.1 %     |
| 8  | 2,194     | 130,970 | 114,531       | 133     | 6.1 %     | 108,146     | 220     | 10.0 %    |
| 9  | 1,525     | 130,862 | 114,634       | 6       | 0.4 %     | 108,974     | 31      | 2.0 %     |
| 10 | 9,278     | 129,861 | 91,142        | 177     | 1.9 %     | 73,660      | 1033    | 11.1 %    |

**Table S6:** Additional sampling statistics for the single-step model sample of the five non-dataset scaffolds. **Legend:** Total number of unique molecules obtained with each sampling approach (Total); Number of sampled molecules in total using the decorator model (Sampled); Number of molecules that overlap between a given decoy set and the molecules generated with a decorator (Overlap); Ratio between the overlap and the total obtained (% overlap).

## Additional figures

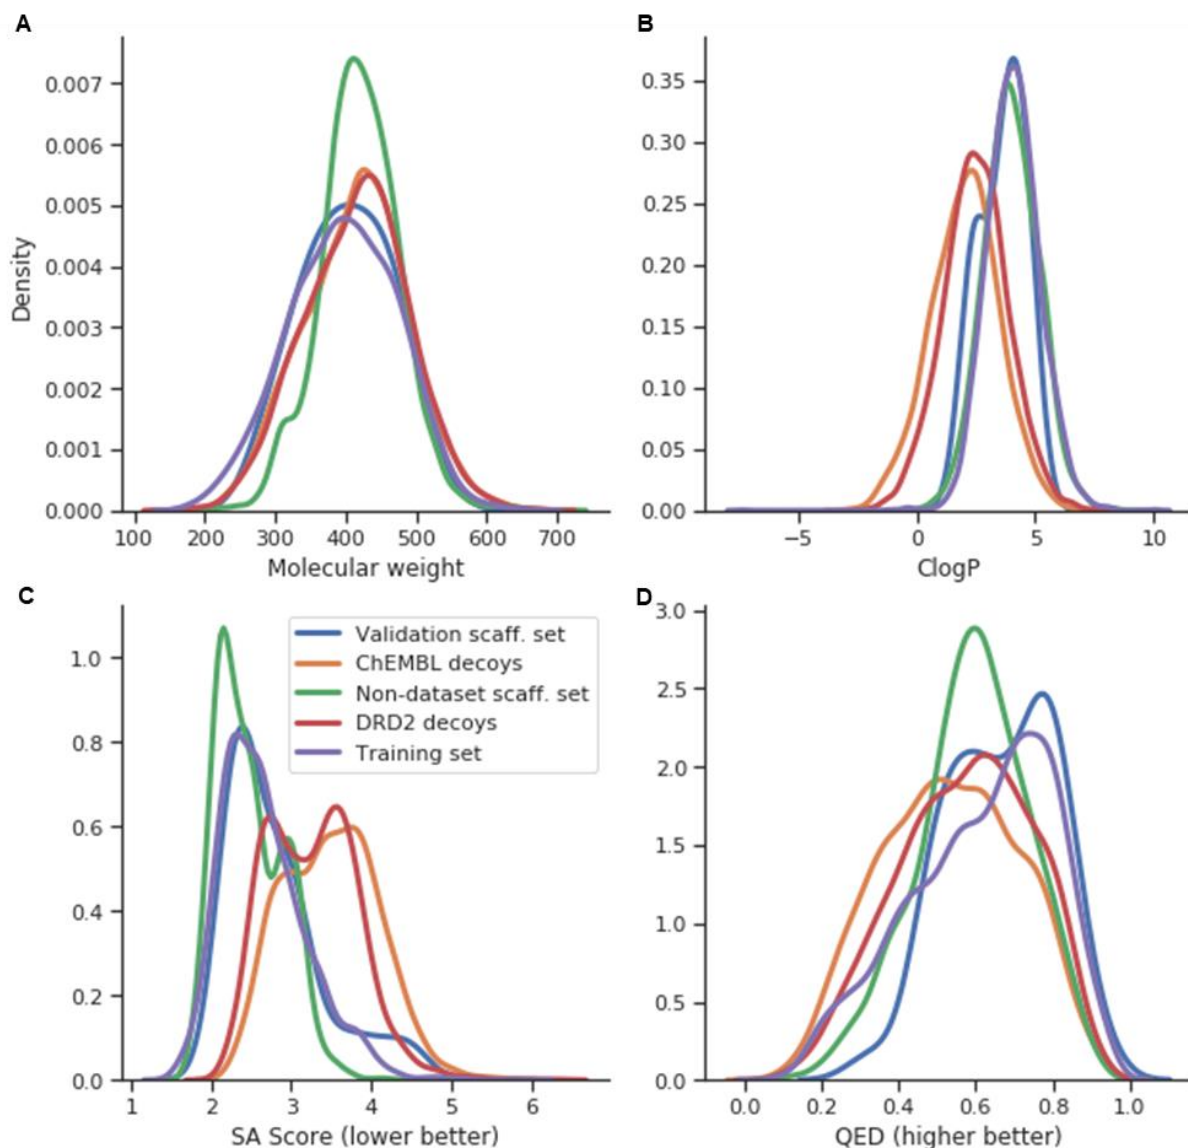

**Figure S1:** Histograms of different descriptors calculated in three sets of molecules obtained from the DRD2 multi-step decorator model: Generated molecules from validation set scaffolds (blue), generated molecules from non-dataset scaffolds (green), training set molecules (purple) and the two decoy sets (ChEMBL – orange, DRD2 – red). A) Molecular weight (Da); B) ClogP; C) Synthetic Accessibility Score; D) Quantitative Estimate of Drug Likeness (QED).

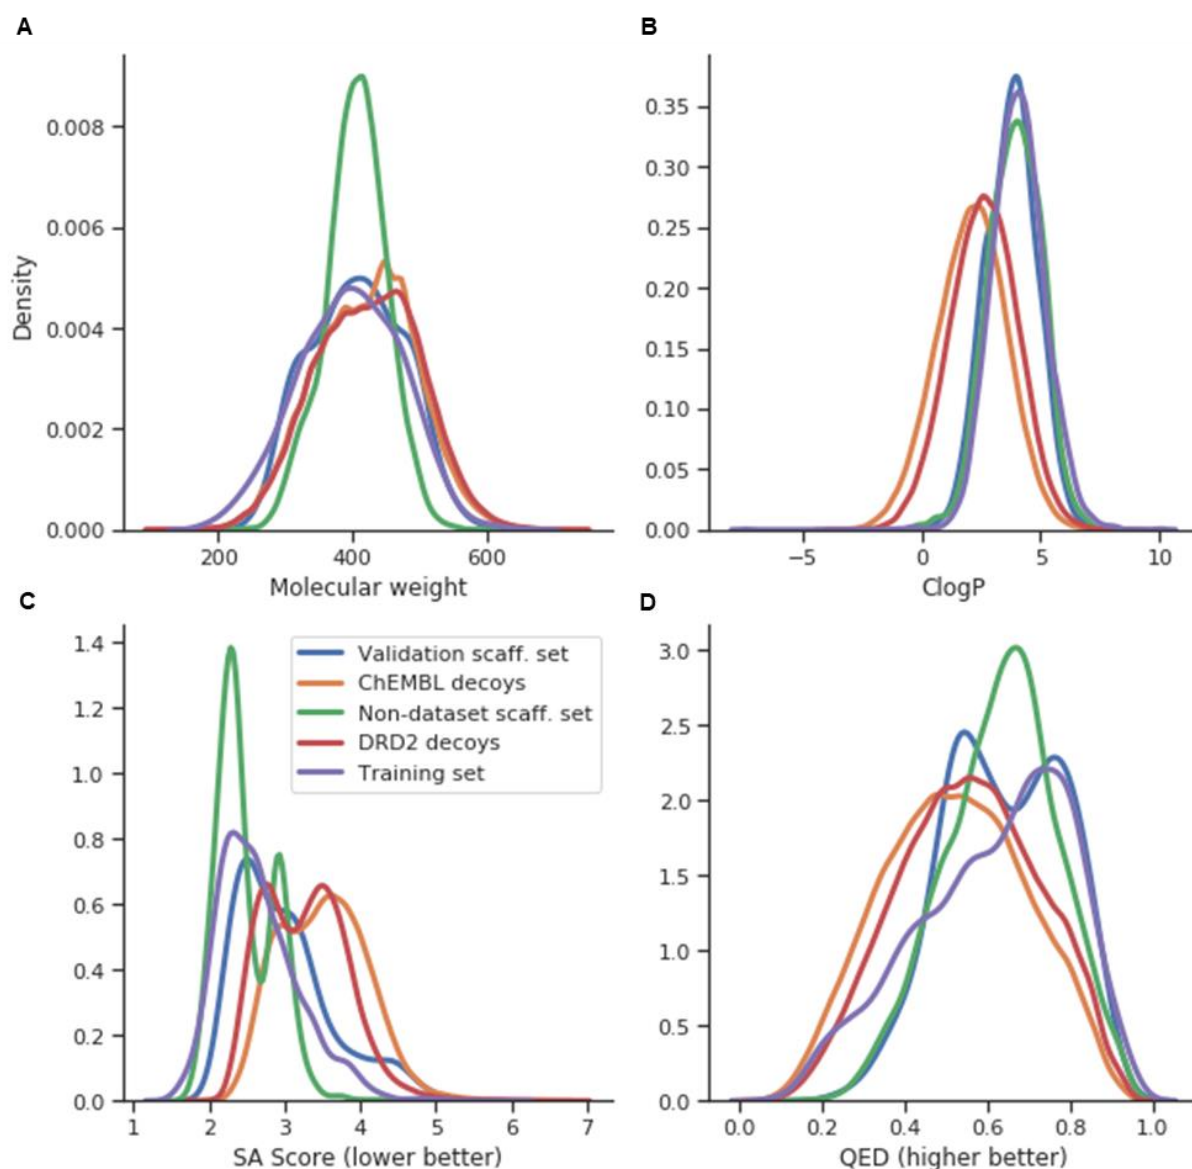

**Figure S2:** Histograms of different descriptors calculated in three sets of molecules obtained from the DRD2 single-step decorator model: Generated molecules from validation set scaffolds (blue), generated molecules from non-dataset scaffolds (green), training set molecules (purple) and the two decoy sets (ChEMBL – orange, DRD2 – red). A) Molecular weight (Da); B) ClogP; C) Synthetic Accessibility Score; D) Quantitative Estimate of Drug Likeness (QED).

### A) Single-step decorator model

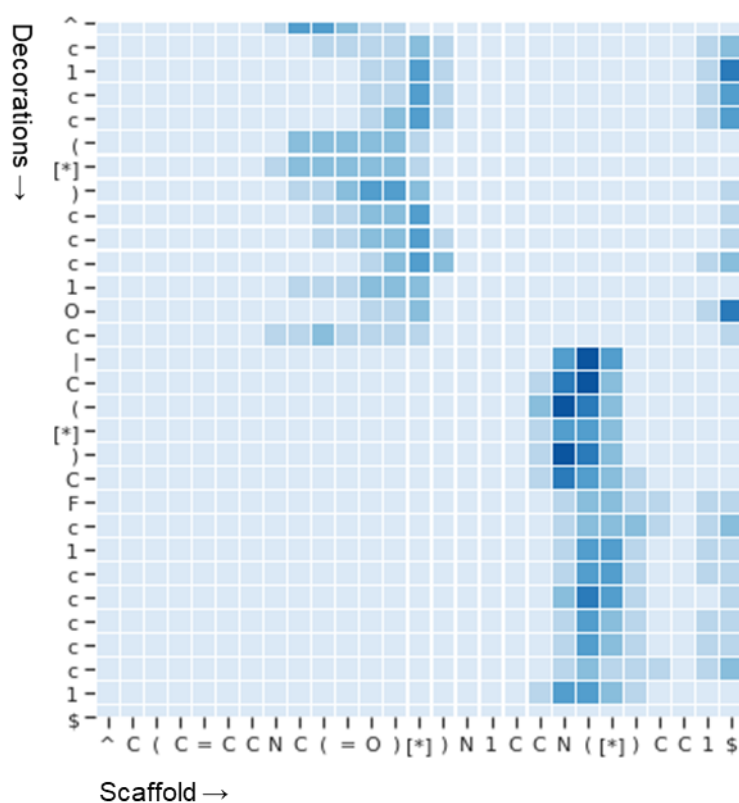

### B) Multi-step decoration model

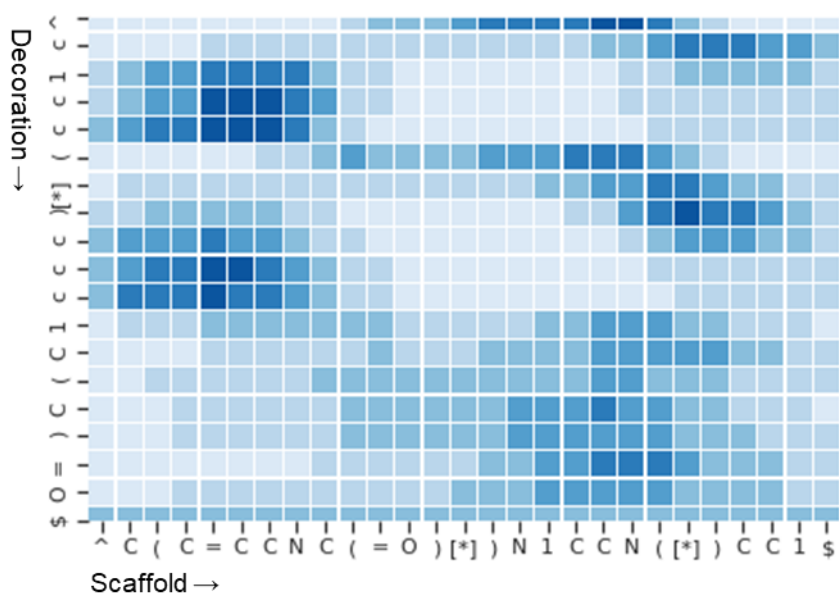

**Figure S3:** Attention weight heat maps for the same randomized SMILES of the scaffold (1) for the single-step (A) and multi-step (B) decoration DRD2 models. Notice how in the single-step model, attention weights usually are focused around the attachment point of the decoration being generated. On the other hand, the multi-step model attention weights have no human-discernible pattern.



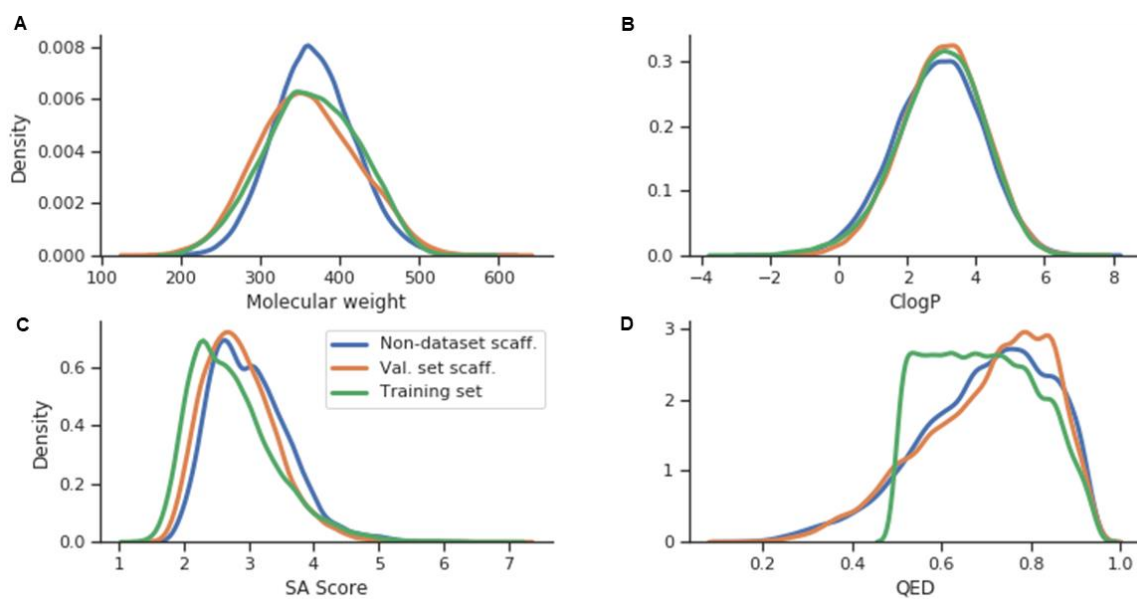

**Figure S4:** Histograms of different descriptors calculated in three sets of molecules obtained from the ChEMBL single-step decorator model: Generated molecules from non-dataset scaffolds (blue), generated molecules from validation set scaffolds (orange) and training set molecules (green). A) Molecular weight (Da); B) ClogP; C) Synthetic Accessibility Score; D) Quantitative Estimate of Drug Likeness (QED). Notice that one of the filtering conditions of the ChEMBL subset was that the molecules had  $QED > 0.5$ .
